# Supplementary material for: Role of Cdkn2a in the Emery–Dreifuss Muscular Dystrophy Cardiac Phenotype
Source: Biomolecules. 2021 Apr 6;11(4):538. doi: 10.3390/biom11040538 (PMC8103514; doi:10.3390/biom11040538)
Supplement: Supplementary file 1 [file biomolecules-11-00538-s001.zip]

Archive with 5 entries (5 files):
- biomolecules-11-00538-s001.pdf
- supplementary video 1.mp4
- supplementary video 2.mp4
- supplementary video 3.mp4
- supplementary video 4.mp4
